# Supplementary material for: CBL mutations in chronic myelomonocytic leukemia often occur in the RING domain with multiple subclones per patient: Implications for targeting
Source: PubMed Central journal article supplement (PMC11412512; doi:10.1371/journal.pone.0310641), 2024-09-19
Supplement: pone.0310641.s001.pdf [file pone.0310641.s001.pdf]

**S1 Table. List of Antibodies for Flow Cytometry**

| <b>Antibody</b>                             | <b>Clone</b> | <b>Manufacturer</b>         | <b>Cat #</b> |
|---------------------------------------------|--------------|-----------------------------|--------------|
| BV421 Mouse anti-human CD45                 | HI30         | BD Horizon                  | 563879       |
| PE-Cy <sup>TM</sup> 7 Mouse anti-Human CD14 | M5E2         | BD Pharmingen <sup>TM</sup> | 557742       |
| PE-Cy <sup>TM</sup> 5 Mouse anti-Human CD16 | 3G8          | BD Pharmingen <sup>TM</sup> | 561725       |
| APC Mouse Anti-Human CD34                   | 8G12         | BD                          | 340441       |
| PE Mouse anti-Human CD114                   | LMM741       | BD Pharmingen <sup>TM</sup> | 554538       |
| PE Rat anti-Human Hu CD115                  | 9-4D2-1E4    | BD Pharmingen <sup>TM</sup> | 565368       |
| PE Mouse anti-Human CD116                   | hGMCSFR-M1   | BD Pharmingen <sup>TM</sup> | 551373       |
| PE Mouse anti-Human CD117                   | YB5.B8       | BD Pharmingen <sup>TM</sup> | 555714       |
| PE Mouse anti-Human CD131                   | 1C1          | Invitrogen                  | 12-1319-42   |
| BV21 Mouse anti-Human CD131                 | 3D7          | BD OptiBuild <sup>TM</sup>  | 752992       |
