# Supplementary material for: CBL mutations in chronic myelomonocytic leukemia often occur in the RING domain with multiple subclones per patient: Implications for targeting
Source: PubMed Central journal article supplement (PMC11412512; doi:10.1371/journal.pone.0310641), 2024-09-19
Supplement: pone.0310641.s002.pdf [file pone.0310641.s002.pdf]

**S2 Table. Mutation status of PREACH-M cohort (n=24) with regards to *CBL* and other RAS pathway mutations (*KRAS*, *NRAS*, *PTPN11*).**

|                     | RAS pathway wildtype |   | RAS pathway mutant |  |
|---------------------|----------------------|---|--------------------|--|
| <i>CBL</i> wildtype | 6                    | 7 | 13                 |  |
| <i>CBL</i> mutant   | 6                    | 5 | 11                 |  |
