# Supplementary material for: CBL mutations in chronic myelomonocytic leukemia often occur in the RING domain with multiple subclones per patient: Implications for targeting
Source: PubMed Central journal article supplement (PMC11412512; doi:10.1371/journal.pone.0310641), 2024-09-19
Supplement: pone.0310641.s003.pdf [file pone.0310641.s003.pdf]

**S3 Table. Spleen craniocaudal length (cm) of *CBL* mutant CMML vs RAS pathway (*KRAS*, *NRAS*, *PTPN11*) wildtype.**

|                   |       | Spleen length (cm)                    | Splenomegaly <sup>#</sup> |
|-------------------|-------|---------------------------------------|---------------------------|
| <i>CBL</i> mutant | MEL13 | 12.6                                  | Yes                       |
|                   | ADE09 | 17.4                                  | Yes                       |
|                   | ADE17 | 16.3                                  | Yes                       |
|                   | BRI07 | 20.6                                  | Yes                       |
|                   | MEL05 | 12.5                                  | Yes                       |
|                   | ADE02 | 13.2                                  | Yes                       |
|                   | ADE03 | 13.0                                  | Yes                       |
|                   | ADE20 | 18.8                                  | Yes                       |
|                   | ADE21 | 20.3                                  | Yes                       |
|                   | MEL06 | 10.2                                  | No                        |
|                   | ADE23 | 12.0                                  | Yes                       |
|                   |       | <b><i>Total with splenomegaly</i></b> | <b><i>10/11 (91%)</i></b> |
| RAS pathway       | BRI14 | 10.8                                  | No                        |
| wildtype          | MEL18 | 11.9                                  | No                        |
|                   | ADE10 | 13.8                                  | Yes                       |
|                   | ADE22 | 10.9                                  | No                        |
|                   | BRI12 | 12.9                                  | Yes                       |
|                   | MEL24 | 11.5                                  | No                        |
|                   |       | <b><i>Total with splenomegaly</i></b> | <b><i>2/6 (33%)</i></b>   |

<sup>#</sup>Splenomegaly defined as spleen cradiocaudal length equal or greater than 12.0 cm

Fisher's exact test;  $P < 0.05$  was statistically significant.  $P = 0.0276$ .
