# Supplementary material for: CBL mutations in chronic myelomonocytic leukemia often occur in the RING domain with multiple subclones per patient: Implications for targeting
Source: PubMed Central journal article supplement (PMC11412512; doi:10.1371/journal.pone.0310641), 2024-09-19
Supplement: pone.0310641.s004.pdf [file pone.0310641.s004.pdf]

**S4 Table. Measurement of C<sub>α</sub>-C<sub>α</sub> distance between residue 227 and 371<sup>δ</sup> from structural analysis of Cbl wildtype and mutant proteins**

| <b>PDB ID</b> | <b>Cbl structure</b> | <b>C<sub>α</sub>-C<sub>α</sub> distance (Å)</b> |
|---------------|----------------------|-------------------------------------------------|
| 2Y1M          | WT closed, inactive  | 9.8                                             |
| 4A4C          | WT open, active      | 46.4                                            |
| 5HKX          | Y371E mutant         | 16.9                                            |
| 5J3X          | Y371F mutant         | 9.5                                             |

<sup>δ</sup>Residues 227 (in the TKBD) and 371 (in the LHR) forms a hydrogen bond in Cbl wildtype closed inactive state, used here as points of reference to show the displacement of LHR following phosphorylation or mutation [C<sub>α</sub> alpha-Carbon, WT wildtype, TKBD tyrosine kinase binding domain, LHR linker helix region]
